# Supplementary material for: In-Feed Supplementation of Resin Acid-Enriched Composition Modulates Gut Microbiota, Improves Growth Performance, and Reduces Post-Weaning Diarrhea and Gut Inflammation in Piglets
Source: MDPI journal article supplement (doi:10.3390/ani11092511), 2021-08-26
Supplement: s1 [file s1]

*Supplementary Materials*

# In-Feed Supplementation of Resin Acid-Enriched Composition Modulates Gut Microbiota, Improves Growth Performance, and Reduces Post-Weaning Diarrhea and Gut Inflammation in Piglets

Md Karim Uddin <sup>1,\*</sup>, Shah Hasan <sup>1,2</sup>, Md. Rayhan Mahmud <sup>1</sup>, Olli Peltoniemi, <sup>1</sup> and Claudio Oliviero <sup>1</sup>

<sup>1</sup> Department of Production Animal Medicine, Faculty of Veterinary Medicine, University of Helsinki, 04920 Saarentaus, Finland; shah.hasan@helsinki.fi (S.H.); rayhan.mahmud@helsinki.fi (M.R.M.); olli.peltoniemi@helsinki.fi (O.P.); claudio.oliviero@helsinki.fi (C.O.)

<sup>2</sup> Hankkija Oy, Peltokuumolantie 4, 05801 Hyvinkää, Finland

\* Correspondence: md.uddin@helsinki.fi

**Citation:** Uddin, M.K.; Hasan, S.; Mahmud, R.; Peltoniemi, O.; Oliviero, C. In-Feed Supplementation of Resin Acid-Enriched Composition Modulates Gut Microbiota, Improves Growth Performance, and Reduces Post-Weaning Diarrhea and Gut Inflammation in Piglets. *Animals* **2021**, *11*, x. <https://doi.org/10.3390/xxxxx>

Academic Editor: Paolo Bosi

Received: 27 July 2021

Accepted: 23 August 2021

Published: date

**Publisher's Note:** MDPI stays neutral with regard to jurisdictional claims in published maps and institutional affiliations.

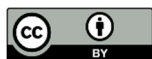

**Copyright:** © 2021 by the authors. Submitted for possible open access publication under the terms and conditions of the Creative Commons Attribution (CC BY) license (<http://creativecommons.org/licenses/by/4.0/>).

**Table S1.** Ingredient and nutrient composition of sow basal diet and piglet creep feed.

| Raw Material<br>(g/kg) | From Weaning<br>to<br>G42 | Gestating<br>Multiparous Sows | Transition Period<br>(G110 to L3) | Lactating<br>Multiparous Sows |
|------------------------|---------------------------|-------------------------------|-----------------------------------|-------------------------------|
| Dry matter             | 874                       | 872                           | 874                               | 879                           |
| Crude protein          | 135                       | 115                           | 136                               | 175                           |
| Crude fat              | 30                        | 25                            | 31                                | 42                            |
| Crude fiber            | 46                        | 55                            | 46                                | 37                            |
| Ash                    | 56                        | 57                            | 55                                | 63                            |
| Calcium                | 8.2                       | 8.5                           | 8.0                               | 10.2                          |
| Phosphorus             | 5.1                       | 5.1                           | 5.1                               | 5.7                           |
| Sodium                 | 2.0                       | 2.0                           | 2.0                               | 2.6                           |

**Table S2.** Chemical composition of RAC (Progres®).

| Fatty Acid Composition %      | Weight %        |
|-------------------------------|-----------------|
| 18:2–9,12 Linoleic acid       | 40.4            |
| 18:1–9 Oleic acid             | 26.9            |
| 18:3–5,9,12 Pinolenic acid    | 6.4             |
| 18:2 Conjugated Linoleic acid | 6.0             |
| Other fatty acids             | 9.1             |
| Fatty acids, total            | 88.8            |
| <b>Resin acid composition</b> | <b>Weight %</b> |
| Abietic acid                  | 3.0             |
| Dehydrobiotic acid            | 1.4             |
| Pimaric acid                  | 1.1             |
| Other resin acids             | 3.7             |
| Resin acids total             | 9.2             |

**Table S3.** Ingredient and nutrient composition of piglet creep feed, post-weaning feed.

| Analysis (per kg) | Creep Feed<br>(Control) | Creep Feed<br>(RAC) | Post-weaning Feed<br>(Control) | Post-weaning Feed<br>(RAC) |
|-------------------|-------------------------|---------------------|--------------------------------|----------------------------|
| NE                | 11.0 MJ                 | 11.0 MJ             | 9.8 MJ                         | 9.8 MJ                     |
| Moisture (%)      | 12.0                    | 12.0                | 12.5                           | 12.5                       |
| Crude protein (%) | 19.0                    | 19.0                | 16.0                           | 16.0                       |
| Crude fat (%)     | 6.9                     | 6.9                 | 3.8                            | 3.8                        |
| Crude fiber (%)   | 2.9                     | 2.9                 | 4.2                            | 4.2                        |
| Ash (%)           | 5.0                     | 5.0                 | 5.0                            | 5.0                        |
| Methionine (g)    | 5.7                     | 5.7                 | 3.9                            | 3.9                        |
| Lysine (g)        | 15.0                    | 15.0                | 11.2                           | 11.2                       |
| Calcium (g)       | 7.2                     | 7.2                 | 7.1                            | 7.1                        |
| Phosphorus (g)    | 5.5                     | 5.5                 | 4.8                            | 4.8                        |
| Sodium (g)        | 2.5                     | 2.5                 | 1.7                            | 1.7                        |
| RAC (%)           |                         | 0.1                 |                                | 0.1                        |

NE = net energy; MJ = megajoule. Resin acid-enriched composition (RAC) was a part of the compound feed formulation, added to creep feed, and post-weaning feed by spraying during the feed mixing.

**Table S4.** Partial Illumina TruSeq adapter sequences added to the 5' ends.

| Forward                      | Reverse                           |
|------------------------------|-----------------------------------|
| F_1; CCTACGGGNGGCWGCAG       | R_1; GACTACHVGGGTATCTAATCC        |
| F_2; gtCCTACGGGNGGCWGCAG     | R_2; aGACTACHVGGGTATCTAATCC       |
| F_3; agagCCTACGGGNGGCWGCAG   | R_3; tctGACTACHVGGGTATCTAATCC     |
| F_4; tagtgtCCTACGGGNGGCWGCAG | R_4; ctgagtgGACTACHVGGGTATCTAATCC |

**Table S5.** Abundant taxa in different sows and piglet treatment groups.

| Taxa (Phylum)                                | CCC Mean | RCC Mean | RCR Mean | RRR Mean | p-Value |
|----------------------------------------------|----------|----------|----------|----------|---------|
| Firmicutes                                   | 9.69     | 9.43     | 9.52     | 9.4      | 0.23    |
| Bacteroidetes                                | 2.07     | 2.75     | 2.64     | 2.87     | 0.23    |
| Actinobacteria                               | 0.67     | 0.66     | 0.65     | 0.68     | 0.97    |
| Proteobacteria                               | 0.53     | 0.98     | 0.55     | 0.67     | 0.0038  |
| Bacteria_unclassified                        | 0.46     | 0.67     | 0.48     | 0.59     | 0.37    |
| Spirochaetes                                 | 0.22     | 0.61     | 0.25     | 0.27     | 0.0053  |
| Campilobacterota                             | 0.16     | 0.3      | 0.18     | 0.16     | 0.03    |
| Candidatus_Saccharibacteri<br>a              | 0.14     | 0.19     | 0.2      | 0.16     | 0.28    |
| Verrucomicrobia                              | 0.085    | 0.26     | 0.077    | 0.11     | 0.011   |
| Chlamydiae                                   | 0.12     | 0.16     | 0.15     | 0.11     | 0.55    |
| Taxa (class)                                 |          |          |          |          |         |
| Betaproteobacteria                           | 0.075    | 0.28     | 0.09     | 0.099    | 0.00022 |
| Bacteroidetes_unclassified                   | 0.4      | 0.95     | 0.36     | 0.53     | 0.0003  |
| Deltaproteobacteria                          | 0.37     | 0.81     | 0.44     | 0.54     | 0.0015  |
| Spirochaetia                                 | 0.22     | 0.61     | 0.25     | 0.27     | 0.0053  |
| Subdivision5                                 | 0.079    | 0.24     | 0.066    | 0.1      | 0.017   |
| Campylobacteria                              | 0.16     | 0.3      | 0.18     | 0.16     | 0.03    |
| Erysipelotrichia                             | 1.29     | 1.23     | 1.64     | 1.26     | 0.084   |
| Bacilli                                      | 5.53     | 5.05     | 4.48     | 4.61     | 0.15    |
| Firmicutes_unclassified                      | 0.54     | 0.91     | 0.63     | 0.71     | 0.19    |
| Actinobacteria                               | 0.12     | 0.18     | 0.013    | 0.099    | 0.19    |
| Bacteroidia                                  | 2.02     | 2.56     | 2.61     | 2.81     | 0.26    |
| Candidatus_Saccharibacteri<br>a_unclassified | 0.14     | 0.19     | 0.2      | 0.16     | 0.28    |
| Bacteria_unclassified                        | 0.46     | 0.67     | 0.48     | 0.59     | 0.37    |
| Negativicutes                                | 1.7      | 1.8      | 2.14     | 2.12     | 0.48    |
| Chlamydiia                                   | 0.12     | 0.16     | 0.15     | 0.11     | 0.55    |
| Clostridia                                   | 7.48     | 7.32     | 7.76     | 7.53     | 0.77    |
| Coriobacteriia                               | 0.65     | 0.6      | 0.65     | 0.66     | 0.82    |
| Gammaproteobacteria                          | 0.26     | 0.26     | 0.23     | 0.3      | 0.96    |
| Taxa (order)                                 |          |          |          |          |         |
| Bacteroidetes_unclassified                   | 0.4      | 0.95     | 0.36     | 0.53     | 0.0005  |
| Desulfovibrionales                           | 0.33     | 0.78     | 0.4      | 0.52     | 0.0022  |
| Spirochaetales                               | 0.22     | 0.61     | 0.25     | 0.27     | 0.0053  |
| Campylobacterales                            | 0.16     | 0.3      | 0.18     | 0.16     | 0.043   |
| Erysipelotrichales                           | 1.29     | 1.23     | 1.64     | 1.26     | 0.069   |
| Acidaminococcales                            | 0.4      | 0.43     | 0.52     | 0.55     | 0.091   |
| Selenomonadales                              | 0.61     | 0.53     | 0.9      | 0.78     | 0.1     |
| Lactobacillales                              | 5.53     | 5.05     | 4.48     | 4.61     | 0.16    |
| Firmicutes_unclassified                      | 0.54     | 0.91     | 0.63     | 0.71     | 0.2     |
| Bacteroidales                                | 2.02     | 2.56     | 2.61     | 2.81     | 0.21    |
| Clostridia_unclassified                      | 0.11     | 0.16     | 0.12     | 0.15     | 0.23    |
| Coriobacteriales                             | 0.43     | 0.34     | 0.45     | 0.48     | 0.26    |
| Candidatus_Saccharibacteri<br>a_unclassified | 0.14     | 0.19     | 0.2      | 0.16     | 0.31    |
| Bacteria_unclassified                        | 0.46     | 0.67     | 0.48     | 0.59     | 0.37    |
| Deltaproteobacteria_unclas<br>sified         | 0.13     | 0.19     | 0.15     | 0.14     | 0.61    |
| Veillonellales                               | 1.44     | 1.6      | 1.82     | 1.84     | 0.63    |
| Eggerthellales                               | 0.43     | 0.43     | 0.4      | 0.4      | 0.67    |
| Clostridiales                                | 7.48     | 7.32     | 7.76     | 7.53     | 0.8     |
| Enterobacterales                             | 0.15     | 0.16     | 0.056    | 0.15     | 0.87    |
| Coriobacteriia_unclassified                  | 0.19     | 0.19     | 0.21     | 0.19     | 0.93    |

| Taxa (family)                        |      |      |      |      |          |
|--------------------------------------|------|------|------|------|----------|
| Streptococcaceae                     | 1.21 | 0.61 | 0.21 | 0.35 | 0.00015  |
| Bacteroidetes__unclassified          | 0.4  | 0.95 | 0.36 | 0.53 | 0.00039  |
| Lachnospiraceae                      | 4.18 | 3.32 | 5.23 | 4.57 | 0.00043  |
| Desulfovibrionaceae                  | 0.33 | 0.78 | 0.4  | 0.52 | 0.0022   |
| Bacteroidales__unclassified          | 0.79 | 1.4  | 0.81 | 0.99 | 0.0028   |
| Clostridiales__Incertae__Sedis__XIII | 0.5  | 0.73 | 0.55 | 0.56 | 0.019    |
| Ruminococcaceae                      | 3.35 | 3.65 | 4.13 | 4.1  | 0.021    |
| Erysipelotrichaceae                  | 1.29 | 1.23 | 1.64 | 1.26 | 0.076    |
| Acidaminococcaceae                   | 0.4  | 0.43 | 0.52 | 0.55 | 0.12     |
| Clostridiaceae__1                    | 4.25 | 4.25 | 3.01 | 3.32 | 0.13     |
| Muribaculaceae                       | 0.76 | 1.03 | 0.81 | 0.84 | 0.13     |
| Selenomonadaceae                     | 0.61 | 0.53 | 0.9  | 0.78 | 0.14     |
| Firmicutes__unclassified             | 0.54 | 0.91 | 0.63 | 0.71 | 0.18     |
| Peptostreptococcaceae                | 2.08 | 2    | 1.69 | 1.61 | 0.23     |
| Prevotellaceae                       | 1.65 | 1.83 | 2.24 | 2.36 | 0.35     |
| Bacteria__unclassified               | 0.46 | 0.67 | 0.48 | 0.59 | 0.36     |
| Lactobacillaceae                     | 5.26 | 5    | 4.47 | 4.58 | 0.52     |
| Veillonellaceae                      | 1.44 | 1.6  | 1.82 | 1.84 | 0.61     |
| Eggerthellaceae                      | 0.43 | 0.43 | 0.4  | 0.4  | 0.65     |
| Clostridiales__unclassified          | 1.27 | 1.43 | 1.39 | 1.41 | 0.86     |
| Taxa (genus)                         |      |      |      |      |          |
| Bacteroidales__unclassified          | 0.79 | 1.4  | 0.81 | 0.99 | 0.0028   |
| <i>Blautia</i>                       | 2.22 | 1.52 | 2.7  | 2.33 | 0.0018   |
| <i>Butyrivibrio</i>                  | 1.34 | 1.18 | 1.75 | 1.7  | 0.016    |
| Clostridiales__unclassified          | 1.27 | 1.43 | 1.39 | 1.41 | 0.86     |
| <i>Clostridium__sensu__stricto</i>   | 4.22 | 4.23 | 3    | 3.3  | 0.14     |
| <i>Dorea</i>                         | 0.86 | 0.69 | 0.86 | 0.8  | 0.3      |
| <i>Faecalibacterium</i>              | 1.49 | 1.18 | 2.05 | 1.68 | 0.054    |
| Firmicutes__unclassified             | 0.54 | 0.91 | 0.63 | 0.71 | 0.19     |
| <i>Gemmiger</i>                      | 1.23 | 0.72 | 1.42 | 1.42 | 0.000067 |
| <i>Holdemanella</i>                  | 0.76 | 0.43 | 0.8  | 0.66 | 0.0073   |
| Lachnospiraceae__unclassified        | 2.96 | 2.37 | 3.82 | 3.42 | 0.0053   |
| <i>Lactobacillus</i>                 | 4.64 | 4.4  | 4.1  | 3.95 | 0.51     |
| <i>Limosilactobacillus</i>           | 2.29 | 2.19 | 1.76 | 2.14 | 0.58     |
| <i>Mediterraneibacter</i>            | 0.9  | 0.64 | 1.18 | 0.86 | 0.003    |
| <i>Megasphaera</i>                   | 1.42 | 1.59 | 1.75 | 1.78 | 0.7      |
| <i>Prevotella</i>                    | 1.51 | 1.67 | 2.13 | 2.25 | 0.27     |
| <i>Romboutsia</i>                    | 0.72 | 1.02 | 0.64 | 0.57 | 0.13     |
| Ruminococcaceae__unclassified        | 1.88 | 2.64 | 2.1  | 2.48 | 0.053    |
| <i>Ruminococcus</i>                  | 0.84 | 0.98 | 1.13 | 1.03 | 0.33     |
| <i>Terrisporobacter</i>              | 1.82 | 1.58 | 1.4  | 1.37 | 0.2      |

RRR = sow RAC feeding-piglets RAC creep feeding-piglets post-weaning RAC feeding; RCR = sow RAC feeding-piglets control creep feeding-piglets post-weaning RAC feeding; RCC = sow RAC feeding-piglets control creep feeding-piglets post-weaning control feeding; and CCC = sow control feeding-piglets control creep feeding-piglets post-weaning control feeding.
